# Supplementary material for: Validating malignant melanoma ICD-9-CM codes in Umbria, ASL Napoli 3 Sud and Friuli Venezia Giulia administrative healthcare databases: a diagnostic accuracy study
Source: PubMed Central journal article supplement — BMJ Open. 2018 Apr 20;8(4):e020631. doi: 10.1136/bmjopen-2017-020631 (PMC5914898; doi:10.1136/bmjopen-2017-020631), 2018-04-20
Supplement: bmjopen-2017-020631.draft_revisions.pdf [file bmjopen-2017-020631.draft_revisions.pdf]

# BMJ Open

BMJ Open is committed to open peer review. As part of this commitment we make the peer review history of every article we publish publicly available.

When an article is published we post the peer reviewers' comments and the authors' responses online. We also post the versions of the paper that were used during peer review. These are the versions that the peer review comments apply to.

The versions of the paper that follow are the versions that were submitted during the peer review process. They are not the versions of record or the final published versions. They should not be cited or distributed as the published version of this manuscript.

BMJ Open is an open access journal and the full, final, typeset and author-corrected version of record of the manuscript is available on our site with no access controls, subscription charges or pay-per-view fees (<http://bmjopen.bmj.com>).

If you have any questions on BMJ Open's open peer review process please email [info.bmjopen@bmj.com](mailto:info.bmjopen@bmj.com)

# BMJ Open

## Accuracy of malignant melanoma ICD-9-CM codes in Umbria, Napoli 3 Sud, and Friuli Venezia Giulia administrative healthcare databases

|                                 |                                                                                                                                                                                                                                                                                                                                                                                                                                                                                                                                                                                                                                                                                                                                                                                                                                                                                                                                                                                                                                                              |
|---------------------------------|--------------------------------------------------------------------------------------------------------------------------------------------------------------------------------------------------------------------------------------------------------------------------------------------------------------------------------------------------------------------------------------------------------------------------------------------------------------------------------------------------------------------------------------------------------------------------------------------------------------------------------------------------------------------------------------------------------------------------------------------------------------------------------------------------------------------------------------------------------------------------------------------------------------------------------------------------------------------------------------------------------------------------------------------------------------|
| Journal:                        | <i>BMJ Open</i>                                                                                                                                                                                                                                                                                                                                                                                                                                                                                                                                                                                                                                                                                                                                                                                                                                                                                                                                                                                                                                              |
| Manuscript ID                   | bmjopen-2017-020631                                                                                                                                                                                                                                                                                                                                                                                                                                                                                                                                                                                                                                                                                                                                                                                                                                                                                                                                                                                                                                          |
| Article Type:                   | Research                                                                                                                                                                                                                                                                                                                                                                                                                                                                                                                                                                                                                                                                                                                                                                                                                                                                                                                                                                                                                                                     |
| Date Submitted by the Author:   | 14-Nov-2017                                                                                                                                                                                                                                                                                                                                                                                                                                                                                                                                                                                                                                                                                                                                                                                                                                                                                                                                                                                                                                                  |
| Complete List of Authors:       | Orso, Massimiliano; Regional Health Authority of Umbria, Health Planning Service of Perugia<br>Serraino, Diego; IRCCS CRO AVIANO, Epidemiology<br>Abraha, Iosief; Regional Health Authority of Umbria, Health Planning Service<br>Fusco, Mario; ASL NA3 Sud, Registro Tumori Regione Campania<br>Giovannini, Gianni; Regional Health Authority of Umbria, Health Planning Office<br>Casucci, Paola; Regional Health Authority of Umbria, Health ICT Service<br>Cozzolino, Francesco; Regional Health Authority of Umbria, Granata, Annalisa<br>Gobbato, Michele; IRCCS CRO AVIANO, SOC Epidemiology<br>Stracci, Fabrizio; University of Perugia, Public Health Department<br>Ciullo, Valerio; ASL NA3 Sud, Registro Tumori Regione Campania<br>Vitale, Maria Francesca; Registro Tumori Regione Campania , ASL NA3 Sud<br>Eusebi, Paolo; University of Perugia, Department of Medicine<br>Orlandi, Walter; Regional Health Authority of Umbria<br>Montedori, Alessandro; Regional Health Authority of Umbria, Bidoli, Ettore; IRCCS CRO AVIANO, Epidemiology |
| <b>Primary Subject Heading</b>: | Oncology                                                                                                                                                                                                                                                                                                                                                                                                                                                                                                                                                                                                                                                                                                                                                                                                                                                                                                                                                                                                                                                     |
| Secondary Subject Heading:      | Epidemiology, Public health, Research methods                                                                                                                                                                                                                                                                                                                                                                                                                                                                                                                                                                                                                                                                                                                                                                                                                                                                                                                                                                                                                |
| Keywords:                       | sensitivity and specificity, administrative database, melanoma, icd-9-cm, validity, accuracy                                                                                                                                                                                                                                                                                                                                                                                                                                                                                                                                                                                                                                                                                                                                                                                                                                                                                                                                                                 |
|                                 |                                                                                                                                                                                                                                                                                                                                                                                                                                                                                                                                                                                                                                                                                                                                                                                                                                                                                                                                                                                                                                                              |

SCHOLARONE™  
Manuscripts

# Accuracy of malignant melanoma ICD-9-CM codes in Umbria, Napoli 3 Sud, and Friuli Venezia Giulia administrative healthcare databases

Massimiliano Orso<sup>1</sup>, Diego Serraino<sup>2</sup>, Iosief Abraha<sup>1 3</sup>, Mario Fusco<sup>4</sup>, Gianni Giovannini<sup>1</sup>, Paola Casucci<sup>5</sup>, Francesco Cozzolino<sup>1</sup>, Annalisa Granata<sup>4</sup>, Michele Gobbato<sup>5</sup>, Fabrizio Stracci<sup>6</sup>, Valerio Ciullo<sup>4</sup>, Maria Francesca Vitale<sup>4</sup>, Paolo Eusebi<sup>1</sup>, Walter Orlandi<sup>7</sup>, Alessandro Montedori<sup>1</sup>, Ettore Bidoli<sup>2</sup>, for the D.I.V.O. Group

## Author affiliations:

1. Health Planning Service, Regional Health Authority of Umbria, Perugia, Italy
2. Cancer Epidemiology Unit, Centro di Riferimento Oncologico Aviano, Aviano, Italy
3. Centro Regionale Sangue, Azienda Ospedaliera di Perugia, Perugia, Italy
4. Registro Tumori Regione Campania, ASL Napoli 3 Sud, Brusciano, Italy
5. SOC Epidemiologia Oncologica, Centro di Riferimento Oncologico Aviano, Aviano, Italy
6. Public Health Department, University of Perugia, Perugia, Italy
7. Regional Health Authority of Umbria, Perugia, Italy

## Corresponding Author:

Iosief Abraha  
Health Planning Service  
Regional Health Authority of Umbria  
Via Mario Angeloni 61  
06124 Perugia, Italy  
[iosief\\_a@yahoo.it](mailto:iosief_a@yahoo.it); [iabraha@regione.umbria.it](mailto:iabraha@regione.umbria.it)

## Abstract

**Objectives** To assess the sensitivity and specificity of melanoma cancer *International Classification of Diseases 9<sup>th</sup> Revision – Clinical Modification* (ICD-9-CM) in three Italian administrative databases.

**Design** A diagnostic accuracy study comparing melanoma ICD-9-CM codes (index test) with medical chart (reference standard). Case ascertainment were based on neoplastic lesion of the skin and a histological diagnosis from a primary or metastatic site positive for melanoma.

**Setting** Administrative databases from Umbria Region, ASL 3 Napoli Sud (NA), and Friuli Venezia Giulia Region (FVG)

**Participants** 112, 130 and 130 cases (subjects with melanoma) were randomly selected from Umbria, NA, and FVG, respectively; 94 non-cases (subjects without melanoma) were randomly selected from each unit.

**Outcome measures** Sensitivity and specificity for ICD-9-CM code 172.x located in primary position.

**Results** The most common melanoma subtype was malignant melanoma of skin of trunk, except scrotum (ICD-9-CM code: 172.5), followed by malignant melanoma of skin of lower limb, including hip (ICD-9-CM code: 172.7). The mean age of the patients ranged from 60 to 61 years. Most of the diagnoses were performed in surgical departments.

The sensitivities were 100% (95% CI 96% to 100%) for Umbria, 99% (95% CI 94% to 100%) for NA, and 98% (95% CI 93% to 100%) for FVG. The specificities were 88% (95% CI 80% to 93%) for Umbria, 77% (95% CI 69% to 85%) for NA, and 79% (95% CI 71% to 86%) for FVG.

**Conclusions** The case definition for melanoma based on clinical or instrumental diagnosis, confirmed by histological examination, showed excellent sensitivities and good specificities in the

1  
2  
3 three operative units. Administrative databases from the three operative units can be used for  
4  
5 epidemiological and outcome research of melanoma.  
6  
7  
8  
9

## 10 11 **Strengths and limitations of this study**

12  
13  
14  
15 This study is the first that evaluated the accuracy of the International Classification of Diseases-9th  
16  
17 Revision – Clinical Modification (ICD-9-CM) codes for melanoma in three large computerized  
18  
19 Italian administrative databases using the same melanoma cancer case definition.

20  
21  
22 The strength of this study includes that of medical chart review as the reference standard and the  
23  
24 use of STAR guidelines for reporting.  
25

26  
27 The results from the present assessment cannot be generalized in other settings.  
28  
29  
30  
31  
32  
33  
34  
35  
36  
37  
38  
39  
40  
41  
42  
43  
44  
45  
46  
47  
48  
49  
50  
51  
52  
53  
54  
55  
56  
57  
58  
59  
60

## Introduction

The burden of cancer is increasingly growing across populations and it is associated with major economic expenses and health resource use. Melanoma is probably the most aggressive form of skin cancer and when it spreads beyond the primary site in the skin it has very poor prognosis<sup>1</sup>.

Reports indicate that incidence of malignant melanoma has increased globally<sup>2,3</sup> having an impact on the public health and economic burden of disease particularly in Western countries<sup>4-6</sup>.

Trends in epidemiology of melanoma, and its survival rates can be assessed using cancer registries or administrative healthcare databases<sup>7</sup>. Compared to cancer registries, administrative databases have the advantage that they can link different sources of information (such as prescription data or comorbidities) providing a comprehensive research. However, these databases need to be adequately validated by comparing their main content, ie, the diagnosis that is represented by the *International Classification of Diseases, 9<sup>th</sup> Revision (ICD-9)* or *10<sup>th</sup> Revision (ICD-10)* edition, with another source, which generally is a cancer registry or the medical chart<sup>8</sup>.

In Italy, all the Regional Health Authorities maintain large healthcare information systems containing patient data from all hospital and territorial sources. These databases have the potential to address important issues in post-marketing surveillance<sup>9,10</sup>, epidemiology<sup>11</sup>, quality performance and health services research<sup>12</sup>. However, there is a concern that their considerable potential as a source of reliable healthcare information has not been achieved due to lack of validation including codes related to melanoma<sup>13</sup>. Hence, it is imperative that Regional Health Authorities systematically validate their databases for critical diseases to productively use the information they contain<sup>13-18</sup>.

The objective of the present study was to evaluate the accuracy of the ICD-9-CM codes in correctly identifying melanoma using three large Italian administrative healthcare databases. We performed this study applying the same methodological approach as stated in our previous protocol on validation concerning breast, lung and colorectal cancer cases<sup>8</sup>.

## Methods

### Setting and data source

#### *Administrative databases*

From the early 90<sup>s</sup>, local and regional Italian administrative databases have collected healthcare data about residents from public and private hospitals. These data include demographics, vital statistics, hospital admission and discharge dates, the admitting hospital department, principal and secondary discharge diagnoses as well as diagnostic procedures. Additionally, these databases comprise the records of all drug prescriptions listed in the National Drug Formulary and prescriber's information. Since health care is covered almost entirely by the Italian National Health System and each resident has a unique regional identification code, it is possible to reconstruct the disease and prescription history of each resident within the administrative database.

The target administrative databases for the present study were from the Umbria Region (890,000 residents), Local Health Unit 3 of Napoli (NA) (1,170,000 residents), and the Friuli Venezia Giulia (FVG) Region (1,227,000 residents). For the purpose of the present study the corresponding Units (Regional Health Authority of Umbria for Umbria Region, Registro Tumori Regione Campania for Local Health Unit 3 of Napoli, and Centro di Riferimento Oncologico Aviano for Friuli Venezia Giulia Region) conducted the same validation process independently within each own database.

#### *Source population*

All residents aged 18 or above of Umbria Region, Local Health Unit 3 of Napoli and the Friuli Venezia Giulia Region represented the target population. Any resident that has been discharged from hospital with a diagnosis of melanoma was considered. Due to difficulty in obtaining the medical charts, subjects that have been hospitalised outside the regional territory of competence were excluded from analysis.

## Case selection and sampling method

In each administrative database, patients with the first occurrence of melanoma between 1<sup>st</sup> January 2012 and 31<sup>st</sup> December 2014 were identified using the ICD-9-CM codes 172.x located in primary position of hospital discharges. The estimated prevalent cases, that is, melanoma cases (ICD-9-CM codes in any position) in the five years (2007-2011) before the period of interest, were excluded. In the same period, non-cases, i.e. patients having in primary position a diagnosis of cancer (ICD-9 140-239) other than melanoma (ICD-9 172.x) were identified. Subsequently, for each of the above reported groups of ICD-9-CM codes, random samples of cases and non-cases were selected from each administrative database.

## Chart abstraction and case ascertainment

The corresponding medical charts of the randomly selected samples of cases and non-cases were obtained from hospitals for validation purposes. Information retrieved from each medical chart included: date of birth and gender of the patient, dates of hospital admission and discharge, and any diagnostic procedure that contributed to the diagnosis of melanoma.

Within each unit, two reviewers received training on data abstraction. Based on a sample of 20 medical charts, within each unit, the inter-rater agreement regarding data abstraction of the several items within the medical charts among the pairs of reviewers was calculated using the  $\kappa$  statistics.

The agreement among the pairs of reviewers resulted very high ( $\kappa > 0.90$ ). Following the consensus review, data abstraction has been completed independently.

Case ascertainment of melanoma within the medical chart was based on (a) the clinically documented presence of a primary lesion of the skin, and (b) the histological documentation of melanoma from a primary or metastatic site<sup>8</sup>. To ensure consistency among reviewers, cases with uncertainty were discussed and resolved through the involvement of an oncologist (Rita Chiari).



### ***Validation criteria***

For melanoma, we considered the ICD-9-CM codes 172.x valid, when there is evidence of a neoplastic lesion of the skin and a histological diagnosis from a primary or metastatic site positive for melanoma.

### **Statistical analysis**

As reported elsewhere<sup>8</sup>, a random sample of 130 charts of cases was necessary to obtain an expected sensitivity of 80% with a precision of 10% and a power of 80%. For specificity calculation, we randomly selected non-cases from an oncological cohort of subjects within the databases excluding the subjects with the ICD-9-codes of melanoma. A sample of 94 charts of non-cases was deemed necessary to obtain an expected specificity of 90% with a precision of 10% and a power of 80%<sup>8</sup>.

Sensitivity and specificity with their corresponding 95% confidence intervals were calculated by constructing 2 x 2 tables.

## Results

The incident cases of melanoma were 113 from Umbria, 134 from NA, and 403 from FVG, from which, respectively, 112, 130 and 130 cases were randomly selected and the corresponding medical charts were requested for assessment. Fourteen (11%) and one medical charts (1%) were not available from NA and Umbria, respectively. **Figure 1** shows the study screening process by which incident cases were identified from the three operative units. For the non-cases, each unit randomly selected 94 medical charts. Two medical charts of non-cases from Umbria were missing.

The most common ICD-9-CM subgroup was the code 172.5 (i.e., malignant melanoma of skin of trunk, except scrotum) accounting for 30% in Umbria, 34% in NA, and 38% in FVG, followed by the code 172.7 (i.e., malignant melanoma of skin of lower limb, including hip) accounting for 19% in Umbria, 26% in NA, and 21% in FVG. The mean age of the patients was 61 years in Umbria, and 60 years in the other two operative units. Most of the cases were identified in surgical departments with a percentage ranging from 75% to 86%. The instrumental tools used for diagnosis included ultrasound, full-body CT scan, whole body PET/CT, CT scan of the head or MRI of the brain, and lymphoscintigraphy.

Histological examinations from biopsy were 77 (69%) for Umbria, 33 (28%) for NA, and 55 (42%) for FVG, while histological examinations from resection specimens after surgery were 80 (71%), 94 (81%), and 118 (91%), respectively. **Table 1** displays the basic characteristics of malignant melanoma of skin cases in each unit.

Clinical or instrumental diagnosis together with histological examinations based on melanoma case definition showed high sensitivities in the three operative units. The sensitivities were 100% (95% CI 96% to 100%) for Umbria, 99% (95% CI 94% to 100%) for NA, and 98% (95% CI 93% to 100%) for FVG. The false positive rates were higher than the false negative rates resulting in the following specificities: 88% (95% CI 80% to 93%) for Umbria, 77% (95% CI 69% to 85%) for NA, and 79% (95% CI 71% to 86%) for FVG.

1  
2  
3 Misclassification of cases and controls is described in **Table 2**. In Umbria, 6 false positive cases  
4 were due to histological documentation missing and 7 were due to negative histology of the wide  
5 excision of previous melanoma. In NA, 15 false positive cases were due to histological  
6 documentation missing and 12 were due to negative histology for melanoma. In FVG, 7 false  
7 positive cases were due to histological examination missing, and 15 were due to negative histology  
8 for melanoma (11 of which resulted positive for melanoma in situ). Overall, there were only two  
9 false negatives, one possible melanoma metastasis (in NA) and another skin cancer of unclear  
10 histology (in FVG).  
11  
12  
13  
14  
15  
16  
17  
18  
19

20 Sensitivity analysis based on the worst case scenario did not show any statistical difference when  
21 missing data were considered false negatives (non-cases) or false positives (cases). Due to the 14  
22 medical charts of the cases the specificity for the NA administrative database was reduced from  
23 77% to 69% (95% CI 61% to 77%) albeit with no statistical difference.  
24  
25  
26  
27  
28  
29  
30  
31  
32  
33  
34  
35  
36  
37  
38  
39  
40  
41  
42  
43  
44  
45  
46  
47  
48  
49  
50  
51  
52  
53  
54  
55  
56  
57  
58  
59  
60

## Discussion

In administrative databases, the diagnosis of a disease is associated with a specific code from the *International Classification of Diseases, 9<sup>th</sup> Revision (ICD-9)* or *10<sup>th</sup> Revision (ICD-10)* edition.

Despite its limitation, the ICD code is an innovative tool designed to map health conditions to corresponding generic categories together with specific variations<sup>19</sup>. Within three administrative databases, we have completed the validation of ICD-9 codes related to breast, lung, colorectal and cervix cancer.

In the present study, we evaluated the validity of diagnoses related to melanoma recorded as administrative data, using chart review as the gold standard. Our results suggest that the ICD-9 codes 172.x are accurate to identify incident melanoma cases. The sensitivities were excellent across all the three administrative databases and specificities were good. As far as we know this is the first study that addressed the topic of validation of melanoma in Italy. In the USA, using a linked SEER tumour registry-Medicare database, Barzilai et al determined the accuracy of Medicare claims to identify patients aged 65+ diagnosed with invasive melanoma<sup>20</sup>. The authors found that the overall sensitivity of combined Part A and Part B Medicare to identify incident cases of melanoma was 90%. Specificity and predictive values were not calculated<sup>20</sup>.

Recent progresses in the use of immune-mediated or therapies such as targeted immunomodulatory therapies such as vemurafenib and dabrafenib have shown encouraging results in survival for metastatic patients with melanoma<sup>21 22</sup>. Another immunotherapeutic agent, ipilimumab, has shown to have important properties in enhancing the immune response against melanoma<sup>23</sup>. Trends in the epidemiology and evaluation of such innovative immunotherapies in terms of long-term outcomes can be performed using population-based studies in these validated administrative databases.

## Strength and limitation

Our main strength is that to ascertain the presence of melanoma we used medical chart in which a clinical diagnosis combined with a histological documentation need to be present. Although we did

1  
2  
3 not publish a specific protocol for the assessment of the accuracy of melanoma ICD-9 codes, our  
4  
5 study was based on the protocol<sup>8</sup> that aimed to assess the validation of codes related to breast,  
6  
7 colorectal and lung cancer. With respect to the methodology, we state that no deviation from  
8  
9 protocol occurred during study performance. Additionally, we followed recommended guidelines  
10  
11 based on the criteria published by the STARD initiative for the accurate reporting of investigations  
12  
13 of diagnostic studies. Hence, we used a detailed and explicit eligibility criteria, as well as duplicate  
14  
15 and independent processes for medical chart review and data abstraction<sup>24-26</sup>.

16  
17  
18 As declared in our protocol we prioritized the estimation of sensitivity rather than positive  
19  
20 predictive value (PPV) because PPVs can be influenced by the prevalence of disease. However, we  
21  
22 calculated the PPVs that resulted 88% for Umbria, 77% for NA, and 82% for FVG. To comply with  
23  
24 the STARD we provide absolute numbers for the 2 X 2 tables.

## 25 26 27 **Conclusion**

28  
29 Our study showed that administrative healthcare databases from Umbria, Napoli and FVG are  
30  
31 accurate in identifying new melanoma cases using the ICD-9 code 172.x. Hence, these databases  
32  
33 can confidently be used to monitor melanoma cancer trends, to assess the quality of healthcare  
34  
35 delivery for patients with melanoma .  
36  
37  
38  
39  
40  
41  
42  
43  
44  
45  
46  
47  
48  
49  
50  
51  
52  
53  
54  
55  
56  
57  
58  
59  
60

## Footnotes

**Contributors:** AM, IA, MF, and DS conceived the original idea of the study. IA, DS, AM, MF, EB, GG, FC, MO, FS and WO designed the study. MC, AG, MFV, FC, MO, PE and VC identified the cohort using administrative database with the supervision of PC, GG, WO, EB, DS, MF, AM and FS. IA, FC, MO, AG, MG, VC, MFV, undertook the data abstraction with the supervision of AM, GG, WO, FS, MF, EB, and DS. IA, FS, AM, and DS performed case ascertainment. IA, AM, FC, PE, VC, and MO performed the analysis. DS, MF, GG, PC, AG, MG, FS, MFV, WO, and EB helped in the interpretation of the data.

The initial draft of the manuscript was prepared by IA, AM, EB, FS, MF, and MO. DS, GG, PC, FC, AG, MG, VC, MFV, PE, and WO revised critically the manuscript for important intellectual content. All the authors read and approved the final manuscript. AM, MF and EB are the guarantor of the data for the respective operative units.

**Funding** This study was developed within the D.I.V.O. project (*Realizzazione di un Database Interregionale Validato per l'Oncologia quale strumento di valutazione di impatto e di appropriatezza delle attività di prevenzione primaria e secondaria in ambito oncologico*) supported by funding from the National Centre for Disease Prevention and Control (CCM 2014), Ministry of Health, Italy. The study funder was not involved in the study design or the writing of the protocol.

**Competing interests** None.

**Data sharing statement** No additional data are available.

### Figure Caption

**Figure 1.** Flow-chart of incident melanoma cancer cases identification in primary position from the three administrative databases and the corresponding charts identified and examined.

**Figure 2.** Sensitivity and specificity with 95% confidence intervals for malignant melanoma ICD-9-CM codes for the three administrative databases.

## References

1. Grimaldi AM, Simeone E, Ascierto PA. The role of MEK inhibitors in the treatment of metastatic melanoma. *Current opinion in oncology* 2014;**26**(2):196-203.
2. Antunes L, Santos LL, Bento MJ. Survival from cancer in the north region of Portugal: results from the first decade of the millennium. *European journal of cancer prevention : the official journal of the European Cancer Prevention Organisation (ECP)* 2017.
3. Apalla Z, Lallas A, Sotiriou E, et al. Epidemiological trends in skin cancer. *Dermatology practical & conceptual* 2017;**7**(2):1-6.
4. Holterhues C, Hollestein LM, Nijsten T, et al. Burden of disease due to cutaneous melanoma has increased in the Netherlands since 1991. *The British journal of dermatology* 2013;**169**(2):389-97.
5. Johnston K, Levy AR, Lorigan P, et al. Economic impact of healthcare resource utilisation patterns among patients diagnosed with advanced melanoma in the United Kingdom, Italy, and France: results from a retrospective, longitudinal survey (MELODY study). *European journal of cancer (Oxford, England : 1990)* 2012;**48**(14):2175-82.
6. Maio M, Ascierto P, Testori A, et al. The cost of unresectable stage III or stage IV melanoma in Italy. *Journal of experimental & clinical cancer research : CR* 2012;**31**:91.
7. Busco S, Buzzoni C, Mallone S, et al. Italian cancer figures--Report 2015: The burden of rare cancers in Italy. *Epidemiol Prev* 2016;**40**(1 Suppl 2):1-120.
8. Abraha I, Serraino D, Giovannini G, et al. Validity of ICD-9-CM codes for breast, lung and colorectal cancers in three Italian administrative healthcare databases: a diagnostic accuracy study protocol. *BMJ Open* 2016;**6**(3):e010547.
9. Traversa G, Bianchi C, Da Cas R, et al. Cohort study of hepatotoxicity associated with nimesulide and other non-steroidal anti-inflammatory drugs. *Bmj* 2003;**327**(7405):18-22.
10. Trifiro G, Patadia V, Schuemie MJ, et al. EU-ADR healthcare database network vs. spontaneous reporting system database: preliminary comparison of signal detection. *Studies in health technology and informatics* 2011;**166**:25-30.
11. Gini R, Francesconi P, Mazzaglia G, et al. Chronic disease prevalence from Italian administrative databases in the VALORE project: a validation through comparison of population estimates with general practice databases and national survey. *BMC public health* 2013;**13**:15.
12. Colais P, Pinnarelli L, Fusco D, et al. The impact of a pay-for-performance system on timing to hip fracture surgery: experience from the Lazio Region (Italy). *BMC health services research* 2013;**13**(1):393.
13. Abraha I, Montedori A, Eusebi P, et al. The Current State of Validation of Administrative Healthcare Databases in Italy: A Systematic Review. *Pharmacoepidemiology and Drug Safety* 2012;**21**:400-00.
14. Cozzolino F, Abraha I, Orso M, et al. Protocol for validating cardiovascular and cerebrovascular ICD-9-CM codes in healthcare administrative databases: the Umbria Data Value Project. *BMJ Open* 2017;**7**(3):e013785.
15. Montedori A, Abraha I, Chiatti C, et al. Validity of peptic ulcer disease and upper gastrointestinal bleeding diagnoses in administrative databases: a systematic review protocol. *BMJ Open* 2016;**6**(9):e011776.
16. Rimland JM, Abraha I, Luchetta ML, et al. Validation of chronic obstructive pulmonary disease (COPD) diagnoses in healthcare databases: a systematic review protocol. *BMJ Open* 2016;**6**(6):e011777.
17. West SL, Strom BL, Poole C. *Validity of Pharmacoepidemiologic Drug and Diagnosis Data*: John Wiley & Sons, Ltd, 2007.
18. Chung CP, Rohan P, Krishnaswami S, et al. A systematic review of validated methods for identifying patients with rheumatoid arthritis using administrative or claims data. *Vaccine* 2013;**31** Suppl 10:K41-61.
19. World Health Organization. *International statistical classification of diseases and health related problems, 10th revision*. Geneva: WHO 1992.

- 1  
2  
3 20. Barzilai DA, Koroukian SM, Neuhauser D, et al. The sensitivity of Medicare data for identifying incident  
4 cases of invasive melanoma (United States). *Cancer causes & control : CCC* 2004;**15**(2):179-84.
- 5 21. Grimaldi AM, Simeone E, Festino L, et al. MEK Inhibitors in the Treatment of Metastatic Melanoma and  
6 Solid Tumors. *American journal of clinical dermatology* 2017.
- 7 22. Grimaldi AM, Simeone E, Festino L, et al. MEK Inhibitors in the Treatment of Metastatic Melanoma and  
8 Solid Tumors. *American journal of clinical dermatology* 2017;**18**(6):745-54.
- 9 23. Hodi FS, O'Day SJ, McDermott DF, et al. Improved survival with ipilimumab in patients with metastatic  
10 melanoma. *The New England journal of medicine* 2010;**363**(8):711-23.
- 11 24. Benchimol EI, Manuel DG, To T, et al. Development and use of reporting guidelines for assessing the  
12 quality of validation studies of health administrative data. *Journal of clinical epidemiology*  
13 2011;**64**(8):821-9.
- 14 25. De Coster C, Quan H, Finlayson A, et al. Identifying priorities in methodological research using ICD-9-CM  
15 and ICD-10 administrative data: report from an international consortium. *BMC health services*  
16 *research* 2006;**6**:77.
- 17 26. Bossuyt PM, Reitsma JB, Bruns DE, et al. Towards complete and accurate reporting of studies of  
18 diagnostic accuracy: The STARD Initiative. *Annals of internal medicine* 2003;**138**(1):40-4.
- 19  
20  
21  
22  
23  
24  
25  
26  
27  
28  
29  
30  
31  
32  
33  
34  
35  
36  
37  
38  
39  
40  
41  
42  
43  
44  
45  
46  
47  
48  
49  
50  
51  
52  
53  
54  
55  
56  
57  
58  
59  
60



**Table 1** Characteristics of subjects with melanoma cancer who were identified in the three administrative healthcare databases

| Characteristics                                     | Unit 1<br>(Umbria) | Unit 2<br>(Friuli Venezia Giulia) | Unit 3<br>(Asl Napoli 3 Sud) |
|-----------------------------------------------------|--------------------|-----------------------------------|------------------------------|
| <b>Incident cases</b><br>(N medical chart reviewed) | 112                | 130                               | 116                          |
| <b>ICD-9 code</b>                                   |                    |                                   |                              |
| 172.0                                               | -                  | 1 (1)                             | -                            |
| 172.1                                               | 1 (1)              | 2 (2)                             | -                            |
| 172.2                                               | 4 (4)              | 3 (2)                             | 2 (2)                        |
| 172.3                                               | 9 (8)              | 13 (10)                           | 8 (7)                        |
| 172.4                                               | 5 (4)              | 9 (7)                             | 2 (2)                        |
| 172.5                                               | 34 (30)            | 49 (38)                           | 39 (34)                      |
| 172.6                                               | 19 (17)            | 15 (12)                           | 11 (10)                      |
| 172.7                                               | 22 (19)            | 27 (21)                           | 30 (26)                      |
| 172.8                                               | 4 (4)              | 8 (6)                             | 5 (4)                        |
| 172.9                                               | 14 (13)            | 3 (2)                             | 19 (16)                      |
| <b>Admission to department</b>                      |                    |                                   |                              |
| Medical                                             | 28 (25)            | 18 (14)                           | 21 (18)                      |
| Surgical                                            | 84 (75)            | 112 (86)                          | 95 (82)                      |
| <b>Sex</b>                                          |                    |                                   |                              |
| Male                                                | 64 (57)            | 69 (53)                           | 52 (45)                      |
| <b>Age, N (%)</b>                                   |                    |                                   |                              |
| < 40                                                | 11 (10)            | 13 (10)                           | 10 (9)                       |
| 40 - 59                                             | 43 (38)            | 56 (43)                           | 46 (39)                      |
| ≥ 60                                                | 58 (52)            | 61 (47)                           | 60 (52)                      |
| <b>Clinical examination</b>                         |                    |                                   |                              |
| Skin lesion                                         | 93 (83)            | 59 (45)                           | 61 (53)                      |
| <b>Instrumental diagnosis</b>                       |                    |                                   |                              |
| <i>Ultrasound</i>                                   | 14                 | 22                                | 30                           |
| <i>CT scan</i>                                      | 57                 | 14                                | 25                           |
| <i>PET/CT</i>                                       | 3                  | 3                                 | 3                            |
| <i>Brain CT scan or RNM</i>                         | 4                  | -                                 | 5                            |

|                                                                                |         |          |         |
|--------------------------------------------------------------------------------|---------|----------|---------|
| <i>Lymphoscintigraphy</i>                                                      | 62      | 64       | 33      |
| <b>Surgical procedures</b>                                                     |         |          |         |
| Excisional biopsy, wide excision, sentinel lymph node biopsy and lymphadectomy | 94 (84) | 119 (92) | 92 (79) |
| <b>Hystological documentation</b>                                              |         |          |         |
| Biopsy                                                                         | 77 (69) | 55 (42)  | 33 (28) |
| Surgical resection specimen                                                    | 80 (71) | 118 (91) | 94 (81) |

**Table 2.** Reason for incorrect identification of cases and controls

| <b>Melanoma</b>        |                                                                         |               |                     |                              |
|------------------------|-------------------------------------------------------------------------|---------------|---------------------|------------------------------|
|                        | <b>Type of misclassification</b>                                        | <b>Umbria</b> | <b>ASL 3 Napoli</b> | <b>Friuli Venezia Giulia</b> |
| <b>False positives</b> |                                                                         |               |                     |                              |
| 1                      | histological examination missing                                        | 6             | 15                  | 7                            |
| 2                      | negative histology                                                      | 7             | 12                  | 15                           |
|                        | a) melanoma in situ                                                     |               |                     | 11                           |
|                        | b) negative histology of wide excisions of previous melanoma            | 7             | 6                   | -                            |
|                        | c) negative histology (nevus, hyperplasia, dysplasia, verrucoid lesion) | -             | 4                   | 4                            |
|                        | d) basal-cell carcinoma                                                 | -             | 2                   | -                            |
| <b>Total</b>           |                                                                         | <b>13</b>     | <b>27</b>           | <b>22</b>                    |
| <b>False negatives</b> |                                                                         |               |                     |                              |
| 1                      | possible melanoma relapse                                               | -             | -                   | -                            |
| 2                      | possible melanoma metastasis                                            | -             | 1                   | -                            |
| 3                      | skin cancer of unclear histology                                        | -             | -                   | 1                            |
| <b>Total</b>           |                                                                         | <b>-</b>      | <b>1</b>            | <b>1</b>                     |

**Table 3.** Cross tabulation of the index test (ICD-9-CM code 172.x) results by the results of the reference standard (medical chart)

| Operative unit                    | TP  | FP | TN | FN |
|-----------------------------------|-----|----|----|----|
| Unit 1<br>(Umbria)                | 99  | 13 | 92 | 0  |
| Unit 2<br>(Friuli Venezia Giulia) | 107 | 23 | 92 | 2  |
| Unit 3<br>(ASL 3 Napoli)          | 89  | 27 | 93 | 1  |

peer review only

1  
2  
3  
4  
5  
6  
7  
8  
9  
10  
11  
12  
13  
14  
15  
16  
17  
18  
19  
20  
21  
22  
23  
24  
25  
26  
27  
28  
29  
30  
31  
32  
33  
34  
35  
36  
37  
38  
39  
40  
41  
42  
43  
44  
45  
46  
47  
48  
49  
50  
51  
52  
53  
54  
55  
56  
57  
58  
59  
60

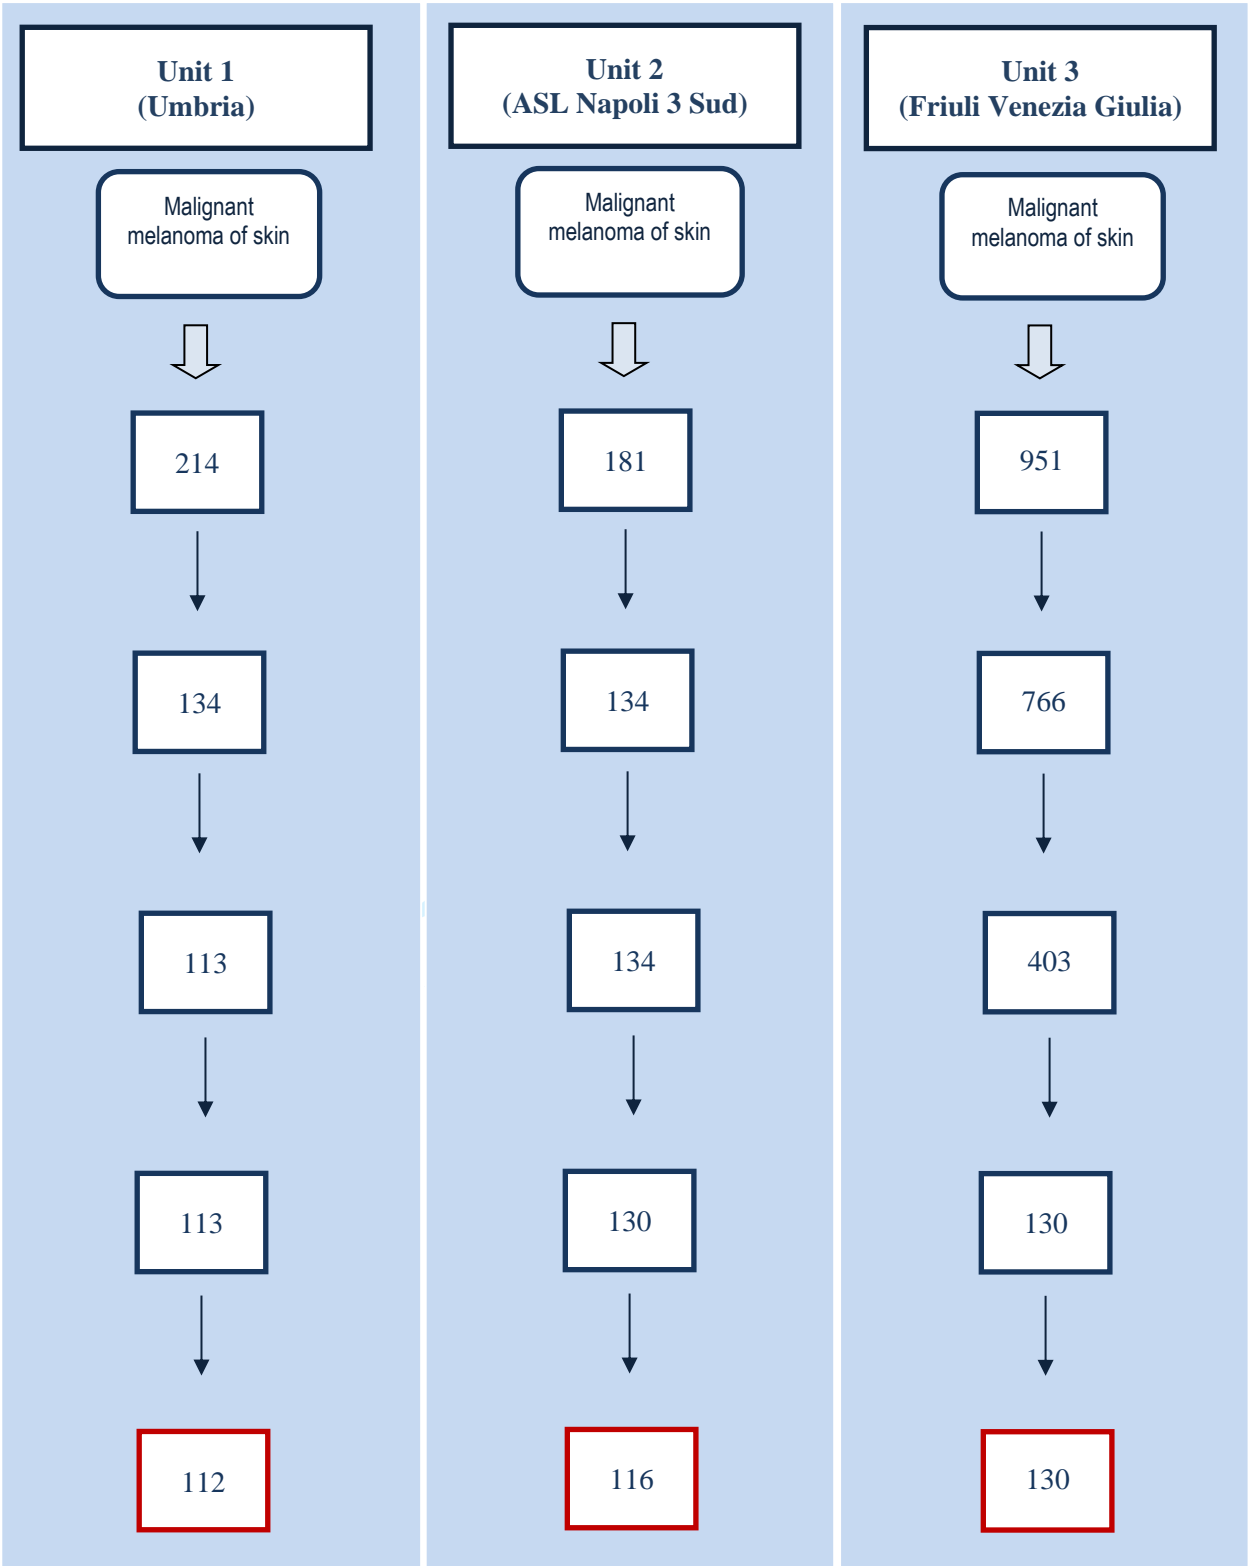

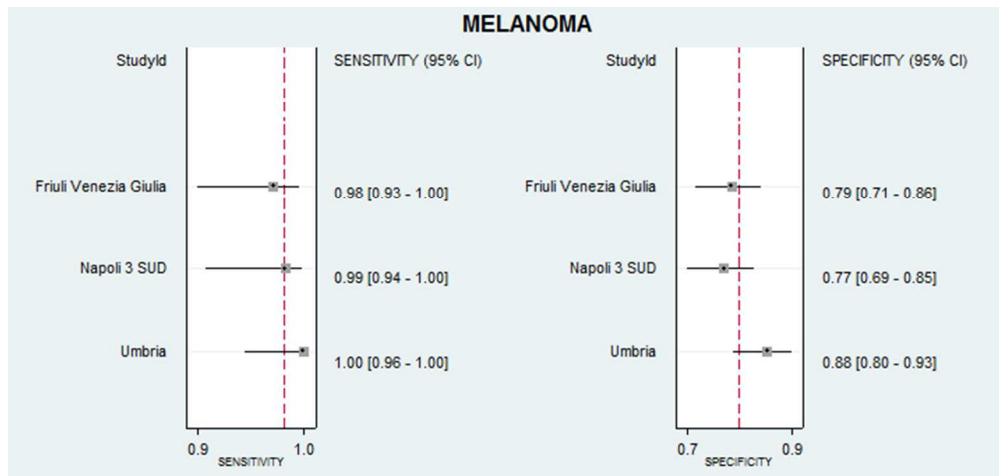

Sensitivity and specificity with 95% confidence intervals for malignant melanoma ICD-9-CM codes for the three administrative databases.

Peer review only

| Section & Topic          | No  | Item                                                                                                                                                   | Reported on page # |
|--------------------------|-----|--------------------------------------------------------------------------------------------------------------------------------------------------------|--------------------|
| <b>TITLE OR ABSTRACT</b> |     |                                                                                                                                                        |                    |
|                          | 1   | Identification as a study of diagnostic accuracy using at least one measure of accuracy (such as sensitivity, specificity, predictive values, or AUC)  | 1                  |
| <b>ABSTRACT</b>          |     |                                                                                                                                                        |                    |
|                          | 2   | Structured summary of study design, methods, results, and conclusions (for specific guidance, see STARD for Abstracts)                                 | 2                  |
| <b>INTRODUCTION</b>      |     |                                                                                                                                                        |                    |
|                          | 3   | Scientific and clinical background, including the intended use and clinical role of the index test                                                     | 4                  |
|                          | 4   | Study objectives and hypotheses                                                                                                                        | 4                  |
| <b>METHODS</b>           |     |                                                                                                                                                        |                    |
| <i>Study design</i>      | 5   | Whether data collection was planned before the index test and reference standard were performed (prospective study) or after (retrospective study)     | 5                  |
| <i>Participants</i>      | 6   | Eligibility criteria                                                                                                                                   | 5-7                |
|                          | 7   | On what basis potentially eligible participants were identified (such as symptoms, results from previous tests, inclusion in registry)                 | 5-6                |
|                          | 8   | Where and when potentially eligible participants were identified (setting, location and dates)                                                         | 5-6                |
|                          | 9   | Whether participants formed a consecutive, random or convenience series                                                                                | 6                  |
| <i>Test methods</i>      | 10a | Index test, in sufficient detail to allow replication                                                                                                  | 6                  |
|                          | 10b | Reference standard, in sufficient detail to allow replication                                                                                          | 6-7                |
|                          | 11  | Rationale for choosing the reference standard (if alternatives exist)                                                                                  | 6                  |
|                          | 12a | Definition of and rationale for test positivity cut-offs or result categories of the index test, distinguishing pre-specified from exploratory         | 7                  |
|                          | 12b | Definition of and rationale for test positivity cut-offs or result categories of the reference standard, distinguishing pre-specified from exploratory | 7                  |
|                          | 13a | Whether clinical information and reference standard results were available to the performers/readers of the index test                                 | na                 |
|                          | 13b | Whether clinical information and index test results were available to the assessors of the reference standard                                          | na                 |
| <i>Analysis</i>          | 14  | Methods for estimating or comparing measures of diagnostic accuracy                                                                                    | 7                  |
|                          | 15  | How indeterminate index test or reference standard results were handled                                                                                | na                 |
|                          | 16  | How missing data on the index test and reference standard were handled                                                                                 | 7                  |
|                          | 17  | Any analyses of variability in diagnostic accuracy, distinguishing pre-specified from exploratory                                                      | na                 |
|                          | 18  | Intended sample size and how it was determined                                                                                                         | 7                  |
| <b>RESULTS</b>           |     |                                                                                                                                                        |                    |
| <i>Participants</i>      | 19  | Flow of participants, using a diagram                                                                                                                  | Figure 1           |
|                          | 20  | Baseline demographic and clinical characteristics of participants                                                                                      | Page 8 and Table 1 |
|                          | 21a | Distribution of severity of disease in those with the target condition                                                                                 | na                 |
|                          | 21b | Distribution of alternative diagnoses in those without the target condition                                                                            | na                 |
|                          | 22  | Time interval and any clinical interventions between index test and reference standard                                                                 | na                 |
| <i>Test results</i>      | 23  | Cross tabulation of the index test results (or their distribution) by the results of the reference standard                                            | Table 3            |
|                          | 24  | Estimates of diagnostic accuracy and their precision (such as 95% confidence intervals)                                                                | Page 8-9, Figure 2 |
|                          | 25  | Any adverse events from performing the index test or the reference standard                                                                            | na                 |
| <b>DISCUSSION</b>        |     |                                                                                                                                                        |                    |
|                          | 26  | Study limitations, including sources of potential bias, statistical uncertainty, and generalisability                                                  | 10-11              |
|                          | 27  | Implications for practice, including the intended use and clinical role of the index test                                                              | 11                 |
| <b>OTHER INFORMATION</b> |     |                                                                                                                                                        |                    |
|                          | 28  | Registration number and name of registry                                                                                                               | na                 |
|                          | 29  | Where the full study protocol can be accessed                                                                                                          | 4                  |
|                          | 30  | Sources of funding and other support; role of funders                                                                                                  | 12                 |

# BMJ Open

## Validating malignant melanoma ICD-9-CM codes in Umbria, ASL Napoli 3 Sud, and Friuli Venezia Giulia administrative healthcare databases: a diagnostic accuracy study

|                                 |                                                                                                                                                                                                                                                                                                                                                                                                                                                                                                                                                                                                                                                                                                                                                                                                                                                                                                                                                                                                                                                                                                                                                                                                                    |
|---------------------------------|--------------------------------------------------------------------------------------------------------------------------------------------------------------------------------------------------------------------------------------------------------------------------------------------------------------------------------------------------------------------------------------------------------------------------------------------------------------------------------------------------------------------------------------------------------------------------------------------------------------------------------------------------------------------------------------------------------------------------------------------------------------------------------------------------------------------------------------------------------------------------------------------------------------------------------------------------------------------------------------------------------------------------------------------------------------------------------------------------------------------------------------------------------------------------------------------------------------------|
| Journal:                        | <i>BMJ Open</i>                                                                                                                                                                                                                                                                                                                                                                                                                                                                                                                                                                                                                                                                                                                                                                                                                                                                                                                                                                                                                                                                                                                                                                                                    |
| Manuscript ID                   | bmjopen-2017-020631.R1                                                                                                                                                                                                                                                                                                                                                                                                                                                                                                                                                                                                                                                                                                                                                                                                                                                                                                                                                                                                                                                                                                                                                                                             |
| Article Type:                   | Research                                                                                                                                                                                                                                                                                                                                                                                                                                                                                                                                                                                                                                                                                                                                                                                                                                                                                                                                                                                                                                                                                                                                                                                                           |
| Date Submitted by the Author:   | 27-Feb-2018                                                                                                                                                                                                                                                                                                                                                                                                                                                                                                                                                                                                                                                                                                                                                                                                                                                                                                                                                                                                                                                                                                                                                                                                        |
| Complete List of Authors:       | Orso, Massimiliano; Regional Health Authority of Umbria, Health Planning Service of Perugia<br>Serraino, Diego; IRCCS CRO AVIANO, Epidemiology<br>Abraha, Iosief; Regional Health Authority of Umbria, Health Planning Service; Agenzia Nazionale per i Servizi Sanitari Regionali (Age.Na.S.), Innovation and development<br>Fusco, Mario; ASL NA3 Sud, Registro Tumori Regione Campania<br>Giovannini, Gianni; Regional Health Authority of Umbria, Health Planning Office<br>Casucci, Paola; Regional Health Authority of Umbria, Health ICT Service<br>Cozzolino, Francesco; Regional Health Authority of Umbria,<br>Granata, Annalisa; ASL Napoli 3 Sud, Registro Tumori Regione Campania<br>Gobbato, Michele; IRCCS CRO AVIANO, SOC Epidemiology<br>Stracci, Fabrizio; University of Perugia, Public Health Department<br>Ciullo, Valerio; ASL NA3 Sud, Registro Tumori Regione Campania<br>Vitale, Maria Francesca; Registro Tumori Regione Campania , ASL NA3 Sud<br>Eusebi, Paolo; University of Perugia, Department of Medicine<br>Orlandi, Walter; Regional Health Authority of Umbria<br>Montedori, Alessandro; Regional Health Authority of Umbria,<br>Bidoli, Ettore; IRCCS CRO AVIANO, Epidemiology |
| <b>Primary Subject Heading</b>: | Oncology                                                                                                                                                                                                                                                                                                                                                                                                                                                                                                                                                                                                                                                                                                                                                                                                                                                                                                                                                                                                                                                                                                                                                                                                           |
| Secondary Subject Heading:      | Epidemiology, Public health, Research methods                                                                                                                                                                                                                                                                                                                                                                                                                                                                                                                                                                                                                                                                                                                                                                                                                                                                                                                                                                                                                                                                                                                                                                      |
| Keywords:                       | sensitivity and specificity, administrative database, melanoma, icd-9-cm, validity, accuracy                                                                                                                                                                                                                                                                                                                                                                                                                                                                                                                                                                                                                                                                                                                                                                                                                                                                                                                                                                                                                                                                                                                       |
|                                 |                                                                                                                                                                                                                                                                                                                                                                                                                                                                                                                                                                                                                                                                                                                                                                                                                                                                                                                                                                                                                                                                                                                                                                                                                    |

SCHOLARONE™  
Manuscripts



# Validating malignant melanoma ICD-9-CM codes in Umbria, ASL Napoli 3 Sud, and Friuli Venezia Giulia administrative healthcare databases: a diagnostic accuracy study

Massimiliano Orso<sup>1</sup>, Diego Serraino<sup>2</sup>, Iosief Abraha<sup>1 3</sup>, Mario Fusco<sup>4</sup>, Gianni Giovannini<sup>1</sup>, Paola Casucci<sup>5</sup>, Francesco Cozzolino<sup>1</sup>, Annalisa Granata<sup>4</sup>, Michele Gobbato<sup>5</sup>, Fabrizio Stracci<sup>6</sup>, Valerio Ciullo<sup>4</sup>, Maria Francesca Vitale<sup>4</sup>, Paolo Eusebi<sup>1</sup>, Walter Orlandi<sup>7</sup>, Alessandro Montedori<sup>1</sup>, Ettore Bidoli<sup>2</sup>, for the D.I.V.O. Group

## *Author affiliations:*

- 1. Health Planning Service, Regional Health Authority of Umbria, Perugia, Italy*
- 2. Cancer Epidemiology Unit, Centro di Riferimento Oncologico Aviano, Aviano, Italy*
- 3. Innovation and development, Agenzia Nazionale per i Servizi Sanitari Regionali (Age.Na.S.), Rome, Italy*
- 4. Registro Tumori Regione Campania, ASL Napoli 3 Sud, Brusciano, Italy*
- 5. SOC Epidemiologia Oncologica, Centro di Riferimento Oncologico Aviano, Aviano, Italy*
- 6. Public Health Department, University of Perugia, Perugia, Italy*
- 7. Regional Health Authority of Umbria, Perugia, Italy*

## Corresponding Author:

Iosief Abraha

Health Planning Service

Regional Health Authority of Umbria

Via Mario Angeloni 61

06124 Perugia, Italy

[iosief\\_a@yahoo.it](mailto:iosief_a@yahoo.it); [iabraha@regione.umbria.it](mailto:iabraha@regione.umbria.it)

## Abstract

**Objectives** To assess the accuracy of *International Classification of Diseases 9th Revision – Clinical Modification* (ICD-9-CM) codes in identifying subjects with melanoma.

**Design** A diagnostic accuracy study comparing melanoma ICD-9-CM codes (index test) with medical chart (reference standard). Case ascertainment was based on neoplastic lesion of the skin and a histological diagnosis from a primary or metastatic site positive for melanoma.

**Setting** Administrative databases from Umbria Region, ASL Napoli 3 Sud (NA), and Friuli Venezia Giulia Region (FVG).

**Participants** 112, 130 and 130 cases (subjects with melanoma) were randomly selected from Umbria, NA, and FVG, respectively; 94 non-cases (subjects without melanoma) were randomly selected from each unit.

**Outcome measures** Sensitivity and specificity for ICD-9-CM code 172.x located in primary position.

**Results** The most common melanoma subtype was malignant melanoma of skin of trunk, except scrotum (ICD-9-CM code: 172.5), followed by malignant melanoma of skin of lower limb, including hip (ICD-9-CM code: 172.7). The mean age of the patients ranged from 60 to 61 years. Most of the diagnoses were performed in surgical departments.

The sensitivities were 100% (95% CI 96% to 100%) for Umbria, 99% (95% CI 94% to 100%) for NA, and 98% (95% CI 93% to 100%) for FVG. The specificities were 88% (95% CI 80% to 93%) for Umbria, 77% (95% CI 69% to 85%) for NA, and 79% (95% CI 71% to 86%) for FVG.

**Conclusions** The case definition for melanoma based on clinical or instrumental diagnosis, confirmed by histological examination, showed excellent sensitivities and good specificities in the three operative units. Administrative databases from the three operative units can be used for epidemiological and outcome research of melanoma.

## Strengths and limitations of this study

- This study is the first that evaluated the accuracy of the International Classification of Diseases-9th Revision – Clinical Modification (ICD-9-CM) codes for melanoma in three large computerized Italian administrative databases using the same case definition for melanoma.
- The strength of this study includes the use of medical chart review as the reference standard and the use of STARD guidelines for reporting.
- The results from the present assessment cannot be generalized in other settings.
- We are unsure whether the results presented for the ICD-9 code 172.x related to malignant melanoma of the skin could be also valid for the corresponding ICD-10 code C43.x.

## Introduction

The burden of cancer is increasingly growing across populations and it is associated with major economic expenses and health resource use. Melanoma is probably the most aggressive form of skin cancer and when it spreads beyond the primary site in the skin it has very poor prognosis<sup>1</sup>.

Reports indicate that incidence of malignant melanoma has increased globally<sup>2,3</sup> having an impact on the public health and economic burden of disease particularly in Western countries<sup>4-6</sup>.

Trends in epidemiology of melanoma, and its survival rates can be assessed using cancer registries or administrative healthcare databases<sup>7</sup>. Compared to cancer registries, administrative databases have the advantage that they can link different sources of information (such as prescription data or comorbidities) providing a comprehensive research. However, these databases need to be adequately validated by comparing their main content, ie, the diagnosis that is represented by the *International Classification of Diseases, 9<sup>th</sup> Revision (ICD-9)* or *10<sup>th</sup> Revision (ICD-10)* edition, with another source, which generally is a cancer registry or the medical chart<sup>8</sup>.

In Italy, all the Regional Health Authorities maintain large healthcare information systems containing patient data from all hospital and territorial sources. These databases have the potential to address important issues in post-marketing surveillance<sup>9,10</sup>, epidemiology<sup>11</sup>, quality performance and health services research<sup>12</sup>. However, there is a concern that their considerable potential as a source of reliable healthcare information has not been achieved due to lack of validation including codes related to melanoma<sup>13</sup>. Hence, it is imperative that Regional Health Authorities systematically validate their databases for critical diseases to productively use the information they contain<sup>13-18</sup>.

The objective of the present study was to evaluate the accuracy of the ICD-9-CM codes in correctly identifying melanoma using three large Italian administrative healthcare databases. We performed this study applying the same methodological approach as stated in our previous protocol on validation concerning breast, lung and colorectal cancer cases<sup>8</sup>.

## Methods

### Setting and data source

#### *Administrative databases*

From the early 90s, local and regional Italian administrative databases have collected healthcare data about residents from public and private hospitals. These data include demographics, vital statistics, hospital admission and discharge dates, the admitting hospital department, principal and secondary discharge diagnoses as well as diagnostic procedures. Additionally, these databases comprise the records of all drug prescriptions listed in the National Drug Formulary and prescriber's information. Since health care is covered almost entirely by the Italian National Health System and each resident has a unique regional identification code, it is possible to reconstruct the disease and prescription history of each resident within the administrative database. However, within the environment of the databases and new code is generated to secure the identity of the residents.

The administrative databases contains also the number of the Hospital Discharge Register with which it is possible to identify the medical charts that are stored physically in their respective hospital or local health unit. The registration number contains the codes of the hospital and department of admission and is generated in way that it becomes a single code at national level to avoid any duplicate.

The target administrative databases for the present study were from the Umbria Region (890,000 residents), ASL Napoli 3 Sud (NA) (1,170,000 residents), and the Friuli Venezia Giulia (FVG) Region (1,227,000 residents). For the purpose of the present study the corresponding Units (Regional Health Authority of Umbria for Umbria Region, Registro Tumori Regione Campania for ASL Napoli 3 Sud, and Centro di Riferimento Oncologico Aviano for Friuli Venezia Giulia Region) conducted the same validation process independently within each own database.

### ***Source population***

All residents aged 18 or above of Umbria Region, ASL Napoli 3 Sud and the Friuli Venezia Giulia Region represented the target population. Any resident that has been discharged from hospital with a diagnosis of melanoma was considered. Due to difficulty in obtaining the medical charts, subjects that have been hospitalised outside the regional territory of competence were excluded from analysis.

### ***Patient and Public Involvement***

Patients were not directly involved. This was a retrospective study based on the consultation of medical charts. Ethical approval for the present study including the access to medical charts was obtained from the Ethics Committee of the Umbria Region Health Authority (CEAS).

### **Case selection and sampling method**

In each administrative database, patients with the first occurrence of melanoma between 1<sup>st</sup> January 2012 and 31<sup>st</sup> December 2014 were identified using the ICD-9-CM codes 172.x located in primary position of hospital discharges. From this cohort, prevalent cases, that is, melanoma cases (ICD-9-CM codes in any position) in the five years (2007-2011) before the period of interest, were excluded. This cohort represented our target population from which a sample of cases was obtained using a simple random method.

In the same time frame, non-cases, i.e. patients having in primary position a diagnosis of cancer (ICD-9 140-239) other than melanoma (ICD-9 172.x) were identified. From this cohort prevalent cases, that is, those with the same diagnosis (ICD-9 140-239 codes in any position) in the five years (2007-2011) before the period of interest, were excluded. This cohort represented our target population from which a sample of non-cases (controls) was obtained using a simple random method.

## Chart abstraction and case ascertainment

The corresponding medical charts of the randomly selected samples of cases and non-cases were obtained from hospitals for validation purposes. Information retrieved from each medical chart included: date of birth and gender of the patient, dates of hospital admission and discharge, and any diagnostic procedure that contributed to the diagnosis of melanoma.

Within each unit, two reviewers received training on data abstraction. Based on a sample of 20 medical charts, within each unit, the inter-rater agreement regarding data abstraction of the several items within the medical charts among the pairs of reviewers was calculated using the  $\kappa$  statistics. The agreement among the pairs of reviewers resulted very high ( $\kappa > 0.90$ ). Following the consensus review, data abstraction has been completed independently.

Case ascertainment of melanoma within the medical chart was based on (a) the clinically documented presence of a primary lesion of the skin, and (b) the histological documentation of melanoma from a primary or metastatic site<sup>8</sup>. To ensure consistency among reviewers, cases with uncertainty were discussed and resolved through the involvement of an oncologist (Rita Chiari).

### *Validation criteria*

For melanoma, we considered the ICD-9-CM codes 172.x valid, when there is evidence of a neoplastic lesion of the skin and a histological diagnosis from a primary or metastatic site positive for melanoma.

### **Statistical analysis**

As reported elsewhere<sup>8</sup>, a random sample of 130 charts of cases was necessary to obtain an expected sensitivity of 80% with a precision of 10% and a power of 80% according to binomial exact calculation<sup>19</sup>. For specificity calculation, we randomly selected non-cases from an oncological cohort of subjects within the databases excluding the subjects with the ICD-9 codes of melanoma. A

1  
2  
3 sample of 94 charts of non-cases was deemed necessary to obtain an expected specificity of 90%  
4  
5 with a precision of 10% and a power of 80%<sup>8</sup>.  
6

7  
8 Sensitivity and specificity with their corresponding 95% confidence intervals were calculated by  
9  
10 constructing 2 x 2 tables.  
11

## 12 13 14 **Results** 15

16  
17 The incident cases of melanoma were 113 from Umbria, 134 from NA, and 403 from FVG, from  
18  
19 which, respectively, 113, 130 and 130 cases were randomly selected and the corresponding medical  
20  
21 charts were requested for assessment. Fourteen (11%) and one medical charts (1%) were not  
22  
23 available from NA and Umbria, respectively. **Figure 1** shows the study screening process by which  
24  
25 incident cases were identified from the three operative units. For the non-cases, each unit randomly  
26  
27 selected 94 medical charts. Two medical charts of non-cases from Umbria were missing.  
28

29  
30 The most common ICD-9-CM subgroup was the code 172.5 (i.e., malignant melanoma of skin of  
31  
32 trunk, except scrotum) accounting for 30% in Umbria, 34% in NA, and 38% in FVG, followed by  
33  
34 the code 172.7 (i.e., malignant melanoma of skin of lower limb, including hip) accounting for 19%  
35  
36 in Umbria, 26% in NA, and 21% in FVG. The mean age of the patients was 61 years in Umbria, and  
37  
38 60 years in the other two operative units. Most of the cases were identified in surgical departments  
39  
40 with a percentage ranging from 75% to 86%. The instrumental tools used for diagnosis included  
41  
42 ultrasound, full-body CT scan, whole body PET/CT, CT scan of the head or MRI of the brain, and  
43  
44 lymphoscintigraphy.  
45

46  
47 Histological examinations from biopsy were 77 (69%) for Umbria, 33 (28%) for NA, and 55 (42%)  
48  
49 for FVG, while histological examinations from resection specimens after surgery were 80 (71%), 94  
50  
51 (81%), and 118 (91%), respectively. **Table 1** displays the basic characteristics of malignant  
52  
53 melanoma of skin cases in each unit.  
54  
55  
56  
57  
58  
59  
60



1  
2  
3 Clinical or instrumental diagnosis together with histological examinations based on melanoma case  
4 definition showed high sensitivities in the three operative units. The sensitivities were 100% (95%  
5 CI 96% to 100%) for Umbria, 99% (95% CI 94% to 100%) for NA, and 98% (95% CI 93% to  
6 100%) for FVG. The false positive rates were higher than the false negative rates resulting in the  
7 following specificities: 88% (95% CI 80% to 93%) for Umbria, 77% (95% CI 69% to 85%) for NA,  
8 and 79% (95% CI 71% to 86%) for FVG. **Figure 2** displays accuracy results with their confidence  
9 intervals.  
10  
11  
12  
13  
14  
15  
16  
17  
18  
19  
20

21 Misclassification of cases and controls is described in **Table 2**. In Umbria, 6 false positive cases  
22 were due to histological documentation missing and 7 were due to negative histology of the wide  
23 excision of previous melanoma. In NA, 15 false positive cases were due to histological  
24 documentation missing and 12 were due to negative histology for melanoma. In FVG, 7 false  
25 positive cases were due to histological examination missing, and 15 were due to negative histology  
26 for melanoma (11 of which resulted positive for melanoma in situ). Overall, there were only two  
27 false negatives, one possible melanoma metastasis (in NA) and another skin cancer of unclear  
28 histology (in FVG).  
29  
30  
31  
32  
33  
34  
35  
36  
37

38 Sensitivity analysis based on the worst case scenario did not show any statistical difference when  
39 missing data were considered false negatives (non-cases) or false positives (cases). Due to the 14  
40 medical charts of the cases, the specificity for the NA administrative database was reduced from  
41 77% to 69% (95% CI 61% to 77%) albeit with no statistical difference.  
42  
43  
44  
45  
46  
47  
48  
49  
50  
51  
52  
53  
54  
55  
56  
57  
58  
59  
60

## Discussion

In administrative databases, the diagnosis of a disease is associated with a specific code from the *International Classification of Diseases, 9<sup>th</sup> Revision (ICD-9) or 10<sup>th</sup> Revision (ICD-10)* edition.

Despite its limitation, the ICD code is an innovative tool designed to map health conditions to corresponding generic categories together with specific variations<sup>20</sup>. Within three administrative databases, we have completed the validation of ICD-9 codes related to breast, lung, colorectal and cervix cancer. We limited our analysis to ICD-9 codes because in Italy they are still used in the hospital discharge data.

In the present study, we evaluated the validity of diagnoses related to melanoma recorded as administrative data, using chart review as the gold standard. Our results suggest that the ICD-9 codes 172.x are accurate to identify incident melanoma cases. The sensitivities were excellent across all the three administrative databases and specificities were good. As far as we know this is the first study that addressed the topic of validation of melanoma in Italy. In the USA, using a linked SEER tumour registry-Medicare database, Barzilai et al determined the accuracy of Medicare claims to identify patients aged 65+ diagnosed with invasive melanoma<sup>21</sup>. The authors found that the overall sensitivity of combined Part A and Part B Medicare to identify incident cases of melanoma was 90%. Specificity and predictive values were not calculated<sup>21</sup>.

Recent progresses in the use of immune-mediated or therapies such as targeted immunomodulatory therapies such as vemurafenib and dabrafenib have shown encouraging results in survival for metastatic patients with melanoma<sup>22 23</sup>. Another immunotherapeutic agent, ipilimumab, has shown to have important properties in enhancing the immune response against melanoma<sup>24</sup>. Trends in the epidemiology and evaluation of such innovative immunotherapies in terms of long-term outcomes can be performed using population-based studies in these validated administrative databases.

## Strength and limitation

Our main strength is that to ascertain the presence of melanoma we used medical chart in which a clinical diagnosis combined with a histological documentation need to be present. Although we did not publish a specific protocol for the assessment of the accuracy of melanoma ICD-9 codes, our study was based on the protocol<sup>8</sup> that aimed to assess the validation of codes related to breast, colorectal and lung cancer. With respect to the methodology, we state that no deviation from protocol occurred during study performance. Additionally, we followed recommended guidelines based on the criteria published by the STARD initiative for the accurate reporting of investigations of diagnostic studies. Hence, we used a detailed and explicit eligibility criteria, as well as duplicate and independent processes for medical chart review and data abstraction<sup>25-27</sup>.

As declared in our protocol we prioritized the estimation of sensitivity rather than positive predictive value (PPV) because PPVs can be influenced by the prevalence of disease. However, we calculated the PPVs that resulted 88% for Umbria, 77% for NA, and 82% for FVG. To comply with the STARD we provide absolute numbers for the 2 X 2 tables (**Table 3**).

The mean age of our sample population ranged between 60 to 61 years that is higher than the mean age (55 years) reported in the medical literature<sup>28</sup>. Age variability can be due to thickness and histological subtype of the melanoma but we were able to plan the acquirement of these data<sup>28</sup>.

A possible limitation of our results for future research is that validation studies of administrative databases are related to the context where they are generated, and may not be generalizable to other settings. Another limitation is that we are unsure whether the results presented for the ICD-9 code 172.x related to malignant melanoma of the skin could be also valid for the corresponding ICD-10 code C43.x.

## Conclusion

Our study showed that administrative healthcare databases from Umbria, Napoli and FVG are accurate in identifying new melanoma cases using the ICD-9 code 172.x. Hence, these databases can confidently be used to monitor melanoma trends, and to assess the quality of health care for patients with melanoma.

## Footnotes

**Contributors:** AM, IA, MF, and DS conceived the original idea of the study. IA, DS, AM, MF, EB, GG, FC, MO, FS and WO designed the study. MG, AG, MFV, FC, MO, PE and VC identified the cohort using administrative database with the supervision of PC, GG, WO, EB, DS, MF, AM and FS. IA, FC, MO, AG, MG, VC, MFV, undertook the data abstraction with the supervision of AM, GG, WO, FS, MF, EB, and DS. IA, FS, AM, and DS performed case ascertainment. IA, AM, FC, PE, VC, and MO performed the analysis. DS, MF, GG, PC, AG, MG, FS, MFV, WO, and EB helped in the interpretation of the data.

The initial draft of the manuscript was prepared by IA, AM, EB, FS, MF, and MO. DS, GG, PC, FC, AG, MG, VC, MFV, PE, and WO revised critically the manuscript for important intellectual content. All the authors read and approved the final manuscript. AM, MF and EB are the guarantor of the data for the respective operative units.

**Funding** This study was developed within the D.I.V.O. project (*Realizzazione di un Database Interregionale Validato per l'Oncologia quale strumento di valutazione di impatto e di appropriatezza delle attività di prevenzione primaria e secondaria in ambito oncologico*) supported by funding from the National Centre for Disease Prevention and Control (CCM 2014), Ministry of Health, Italy. The study funder was not involved in the study design or the writing of the protocol.

**Competing interests** None.

**Ethics approval** Regional Committee Ethics of Umbria (CEAS), authorization number 2656/15 (04/11/2015).

**Data sharing statement** No additional data are available.

## Figure Caption

**Figure 1.** Flow-chart of incident melanoma cases identification in primary position from the three administrative databases and the corresponding charts identified and examined.

**Figure 2.** Sensitivity and specificity with 95% confidence intervals for malignant melanoma ICD-9-CM codes for the three administrative databases.

## References

1. Grimaldi AM, Simeone E, Ascierto PA. The role of MEK inhibitors in the treatment of metastatic melanoma. *Current opinion in oncology* 2014;26(2):196-203. doi: 10.1097/cco.000000000000050 [published Online First: 2014/01/15]
2. Antunes L, Santos LL, Bento MJ. Survival from cancer in the north region of Portugal: results from the first decade of the millennium. *European journal of cancer prevention : the official journal of the European Cancer Prevention Organisation (ECP)* 2017 doi: 10.1097/cej.0000000000000378 [published Online First: 2017/06/08]
3. Apalla Z, Lallas A, Sotiriou E, et al. Epidemiological trends in skin cancer. *Dermatology practical & conceptual* 2017;7(2):1-6. doi: 10.5826/dpc.0702a01 [published Online First: 2017/05/19]
4. Holterhues C, Hollestein LM, Nijsten T, et al. Burden of disease due to cutaneous melanoma has increased in the Netherlands since 1991. *The British journal of dermatology* 2013;169(2):389-97. doi: 10.1111/bjd.12346 [published Online First: 2013/04/05]
5. Johnston K, Levy AR, Lorigan P, et al. Economic impact of healthcare resource utilisation patterns among patients diagnosed with advanced melanoma in the United Kingdom, Italy, and France: results from a retrospective, longitudinal survey (MELODY study). *European journal of cancer (Oxford, England : 1990)* 2012;48(14):2175-82. doi: 10.1016/j.ejca.2012.03.003 [published Online First: 2012/04/07]
6. Maio M, Ascierto P, Testori A, et al. The cost of unresectable stage III or stage IV melanoma in Italy. *Journal of experimental & clinical cancer research : CR* 2012;31:91. doi: 10.1186/1756-9966-31-91 [published Online First: 2012/11/03]
7. Busco S, Buzzoni C, Mallone S, et al. Italian cancer figures--Report 2015: The burden of rare cancers in Italy. *Epidemiol Prev* 2016;40(1 Suppl 2):1-120. doi: 10.19191/ep16.1s2.p001.035 [published Online First: 2016/03/10]
8. Abraha I, Serraino D, Giovannini G, et al. Validity of ICD-9-CM codes for breast, lung and colorectal cancers in three Italian administrative healthcare databases: a diagnostic accuracy study protocol. *BMJ Open* 2016;6(3):e010547. doi: 10.1136/bmjopen-2015-010547
9. Traversa G, Bianchi C, Da Cas R, et al. Cohort study of hepatotoxicity associated with nimesulide and other non-steroidal anti-inflammatory drugs. *Bmj* 2003;327(7405):18-22. doi: 10.1136/bmj.327.7405.18
10. Trifiro G, Patadia V, Schuemie MJ, et al. EU-ADR healthcare database network vs. spontaneous reporting system database: preliminary comparison of signal detection. *Studies in health technology and informatics* 2011;166:25-30.
11. Gini R, Francesconi P, Mazzaglia G, et al. Chronic disease prevalence from Italian administrative databases in the VALORE project: a validation through comparison of population estimates with general practice databases and national survey. *BMC public health* 2013;13:15. doi: 10.1186/1471-2458-13-15
12. Colais P, Pinnarelli L, Fusco D, et al. The impact of a pay-for-performance system on timing to hip fracture surgery: experience from the Lazio Region (Italy). *BMC health services research* 2013;13(1):393. doi: 10.1186/1472-6963-13-393
13. Abraha I, Montedori A, Eusebi P, et al. The Current State of Validation of Administrative Healthcare Databases in Italy: A Systematic Review. *Pharmacoepidemiology and Drug Safety* 2012;21:400-00.
14. Cozzolino F, Abraha I, Orso M, et al. Protocol for validating cardiovascular and cerebrovascular ICD-9-CM codes in healthcare administrative databases: the Umbria Data Value Project. *BMJ Open* 2017;7(3):e013785. doi: 10.1136/bmjopen-2016-013785 [published Online First: 2017/04/01]
15. Montedori A, Abraha I, Chiatti C, et al. Validity of peptic ulcer disease and upper gastrointestinal bleeding diagnoses in administrative databases: a systematic review protocol. *BMJ Open* 2016;6(9):e011776. doi: 10.1136/bmjopen-2016-011776 [published Online First: 2016/09/17]
16. Rimland JM, Abraha I, Luchetta ML, et al. Validation of chronic obstructive pulmonary disease (COPD) diagnoses in healthcare databases: a systematic review protocol. *BMJ Open* 2016;6(6):e011777. doi: 10.1136/bmjopen-2016-011777 [published Online First: 2016/06/03]

17. West SL, Strom BL, Poole C. Validity of Pharmacoepidemiologic Drug and Diagnosis Data: John Wiley & Sons, Ltd 2007.
18. Chung CP, Rohan P, Krishnaswami S, et al. A systematic review of validated methods for identifying patients with rheumatoid arthritis using administrative or claims data. *Vaccine* 2013;31 Suppl 10:K41-61. doi: 10.1016/j.vaccine.2013.03.075 [published Online First: 2013/12/18]
19. Wilson EB. Probable inference, the law of succession, and statistical inference. *Journal of the American Statistical Association* 1927;22:209-12.
20. World Health Organization. International statistical classification of diseases and health related problems, 10th revision. *Geneva: WHO* 1992
21. Barzilai DA, Koroukian SM, Neuhauser D, et al. The sensitivity of Medicare data for identifying incident cases of invasive melanoma (United States). *Cancer causes & control : CCC* 2004;15(2):179-84. doi: 10.1023/b:caco.0000019504.74553.32 [published Online First: 2004/03/16]
22. Grimaldi AM, Simeone E, Festino L, et al. MEK Inhibitors in the Treatment of Metastatic Melanoma and Solid Tumors. *American journal of clinical dermatology* 2017 doi: 10.1007/s40257-017-0292-y [published Online First: 2017/05/26]
23. Grimaldi AM, Simeone E, Festino L, et al. MEK Inhibitors in the Treatment of Metastatic Melanoma and Solid Tumors. *American journal of clinical dermatology* 2017;18(6):745-54. doi: 10.1007/s40257-017-0292-y [published Online First: 2017/05/26]
24. Hodi FS, O'Day SJ, McDermott DF, et al. Improved survival with ipilimumab in patients with metastatic melanoma. *The New England journal of medicine* 2010;363(8):711-23. doi: 10.1056/NEJMoa1003466 [published Online First: 2010/06/08]
25. Benchimol EI, Manuel DG, To T, et al. Development and use of reporting guidelines for assessing the quality of validation studies of health administrative data. *Journal of clinical epidemiology* 2011;64(8):821-9. doi: 10.1016/j.jclinepi.2010.10.006
26. De Coster C, Quan H, Finlayson A, et al. Identifying priorities in methodological research using ICD-9-CM and ICD-10 administrative data: report from an international consortium. *BMC health services research* 2006;6:77. doi: 10.1186/1472-6963-6-77
27. Bossuyt PM, Reitsma JB, Bruns DE, et al. Towards complete and accurate reporting of studies of diagnostic accuracy: The STARD Initiative. *Annals of internal medicine* 2003;138(1):40-4.
28. Bataille V, de Vries E. Melanoma--Part 1: epidemiology, risk factors, and prevention. *Bmj* 2008;337:a2249. doi: 10.1136/bmj.a2249 [published Online First: 2008/11/22]

**Table 1** Characteristics of subjects with melanoma who were identified in the three administrative healthcare databases

| Characteristics                                                         | Unit 1<br>(Umbria) | Unit 2<br>(Asl Napoli<br>3 Sud) | Unit 3<br>(Friuli Venezia<br>Giulia) |
|-------------------------------------------------------------------------|--------------------|---------------------------------|--------------------------------------|
| <b>Incident cases</b><br>(N medical chart reviewed)                     | 112                | 116                             | 130                                  |
| <b>ICD-9 code, N (%)</b>                                                |                    |                                 |                                      |
| 172.0 Malignant melanoma of skin of lip                                 | -                  | -                               | 1 (1)                                |
| 172.1 Malignant melanoma of skin of eyelid, including canthus           | 1 (1)              | -                               | 2 (2)                                |
| 172.2 Malignant melanoma of skin of ear and external auditory canal     | 4 (4)              | 2 (2)                           | 3 (2)                                |
| 172.3 Malignant melanoma of skin of other and unspecified parts of face | 9 (8)              | 8 (7)                           | 13 (10)                              |
| 172.4 Malignant melanoma of skin of scalp and neck                      | 5 (4)              | 2 (2)                           | 9 (7)                                |
| 172.5 Malignant melanoma of skin of trunk, except scrotum               | 34 (30)            | 39 (34)                         | 49 (38)                              |
| 172.6 Malignant melanoma of skin of upper limb, including shoulder      | 19 (17)            | 11 (10)                         | 15 (12)                              |
| 172.7 Malignant melanoma of skin of lower limb, including hip           | 22 (19)            | 30 (26)                         | 27 (21)                              |
| 172.8 Malignant melanoma of other specified sites of skin               | 4 (4)              | 5 (4)                           | 8 (6)                                |
| 172.9 Melanoma of skin, site unspecified                                | 14 (13)            | 19 (16)                         | 3 (2)                                |
| <b>Admission to department, N (%)</b>                                   |                    |                                 |                                      |
| Medical                                                                 | 28 (25)            | 21 (18)                         | 18 (14)                              |
| Surgical                                                                | 84 (75)            | 95 (82)                         | 112 (86)                             |
| <b>Sex, N (%)</b>                                                       |                    |                                 |                                      |
| Male                                                                    | 64 (57)            | 52 (45)                         | 69 (53)                              |
| <b>Age, N (%)</b>                                                       |                    |                                 |                                      |
| < 40                                                                    | 11 (10)            | 10 (9)                          | 13 (10)                              |
| 40 - 59                                                                 | 43 (38)            | 46 (39)                         | 56 (43)                              |
| ≥ 60                                                                    | 58 (52)            | 60 (52)                         | 61 (47)                              |
| <b>Clinical examination, N (%)</b>                                      |                    |                                 |                                      |
| Detailed clinical description of the skin lesion                        | 93 (83)            | 61 (53)                         | 59 (45)                              |
| <b>Instrumental diagnosis, N (%)</b>                                    |                    |                                 |                                      |
| Ultrasound                                                              | 14 (13)            | 30 (26)                         | 22 (17)                              |

|                                                                                  |         |         |          |
|----------------------------------------------------------------------------------|---------|---------|----------|
| CT scan                                                                          | 57 (51) | 25 (22) | 14 (11)  |
| PET/CT                                                                           | 3 (3)   | 3 (3)   | 3 (2)    |
| Brain CT scan or MRI                                                             | 4 (4)   | 5 (4)   | -        |
| Lymphoscintigraphy                                                               | 62 (55) | 33 (28) | 64 (49)  |
| None instrumental examinations                                                   | 48 (43) | 43 (37) | 58 (45)  |
| <b>Surgical procedures, N (%)</b>                                                |         |         |          |
| Excisional biopsy, wide excision, sentinel lymph node biopsy and lymphadenectomy | 94 (84) | 92 (79) | 119 (92) |
| <b>Hystological documentation, N (%)</b>                                         |         |         |          |
| Diagnostic biopsy                                                                | 77 (69) | 33 (28) | 55 (42)  |
| Excision biopsy                                                                  | 80 (71) | 94 (81) | 118 (91) |
| Both diagnostic and excision biopsies                                            | 56 (50) | 28 (24) | 52 (40)  |



**Table 2.** Reason for incorrect identification of cases and controls

| <b>Melanoma</b>        |                                                                         |               |                     |                              |
|------------------------|-------------------------------------------------------------------------|---------------|---------------------|------------------------------|
|                        | <b>Type of misclassification</b>                                        | <b>Umbria</b> | <b>ASL Napoli 3</b> | <b>Friuli Venezia Giulia</b> |
| <b>False positives</b> |                                                                         |               |                     |                              |
| 1                      | histological examination missing                                        | 6             | 15                  | 7                            |
| 2                      | negative histology                                                      | 7             | 12                  | 15                           |
|                        | a) melanoma in situ                                                     | -             | -                   | 11                           |
|                        | b) negative histology of wide excisions of previous melanoma            | 7             | 6                   | -                            |
|                        | c) negative histology (nevus, hyperplasia, dysplasia, verrucoid lesion) | -             | 4                   | 4                            |
|                        | d) basal-cell carcinoma                                                 | -             | 2                   | -                            |
| <b>Total</b>           |                                                                         | <b>13</b>     | <b>27</b>           | <b>22</b>                    |
| <b>False negatives</b> |                                                                         |               |                     |                              |
| 1                      | possible melanoma relapse                                               | -             | -                   | -                            |
| 2                      | possible melanoma metastasis                                            | -             | 1                   | -                            |
| 3                      | skin cancer of unclear histology                                        | -             | -                   | 1                            |
| <b>Total</b>           |                                                                         | <b>-</b>      | <b>1</b>            | <b>1</b>                     |

**Table 3.** Cross tabulation of the index test (ICD-9-CM code 172.x) results by the results of the reference standard (medical chart)

| Operative unit                    | TP  | FP | TN | FN |
|-----------------------------------|-----|----|----|----|
| Unit 1<br>(Umbria)                | 99  | 13 | 92 | 0  |
| Unit 2<br>(ASL Napoli 3 Sud)      | 89  | 27 | 93 | 1  |
| Unit 3<br>(Friuli Venezia Giulia) | 107 | 23 | 92 | 2  |

peer review only

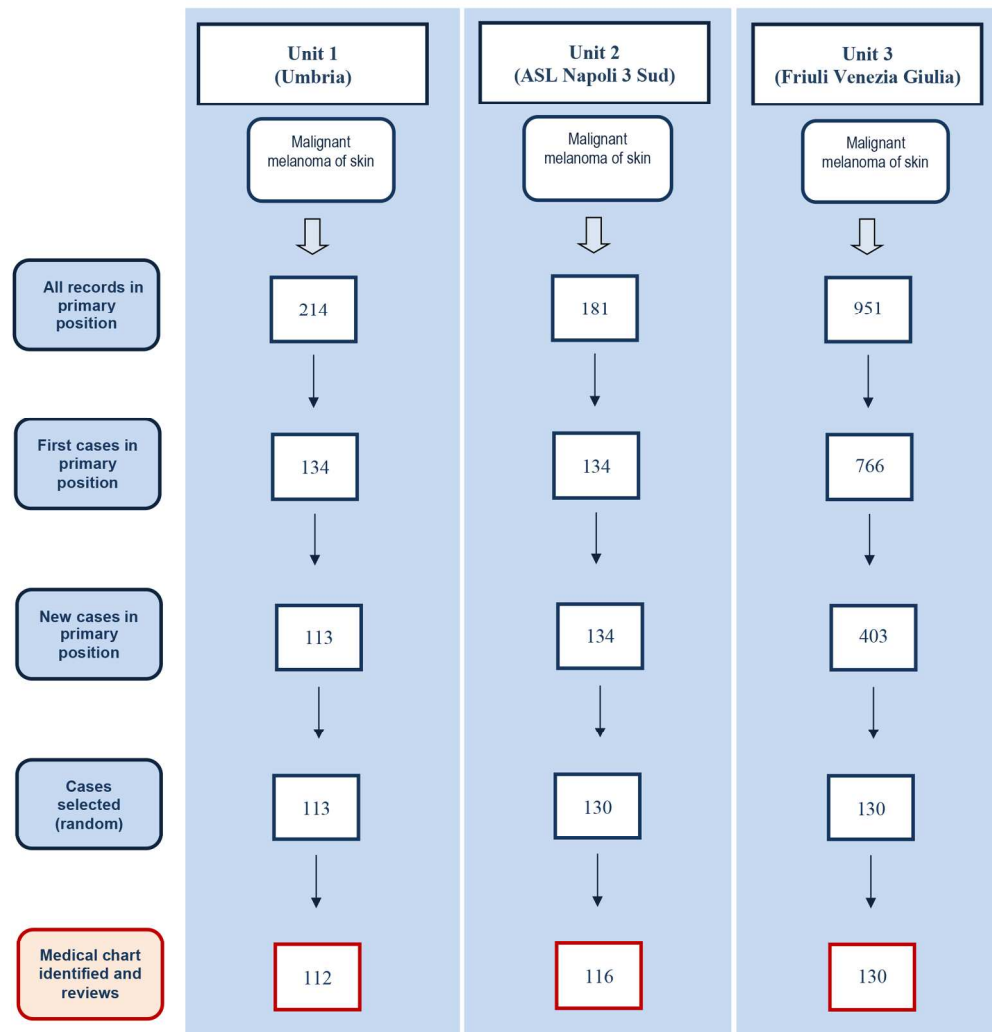

40  
41  
42  
43  
44  
45  
46  
47  
48  
49  
50  
51  
52  
53  
54  
55  
56  
57  
58  
59  
60

Flow-chart of incident melanoma cases identification in primary position from the three administrative databases and the corresponding charts identified and examined.

173x181mm (300 x 300 DPI)

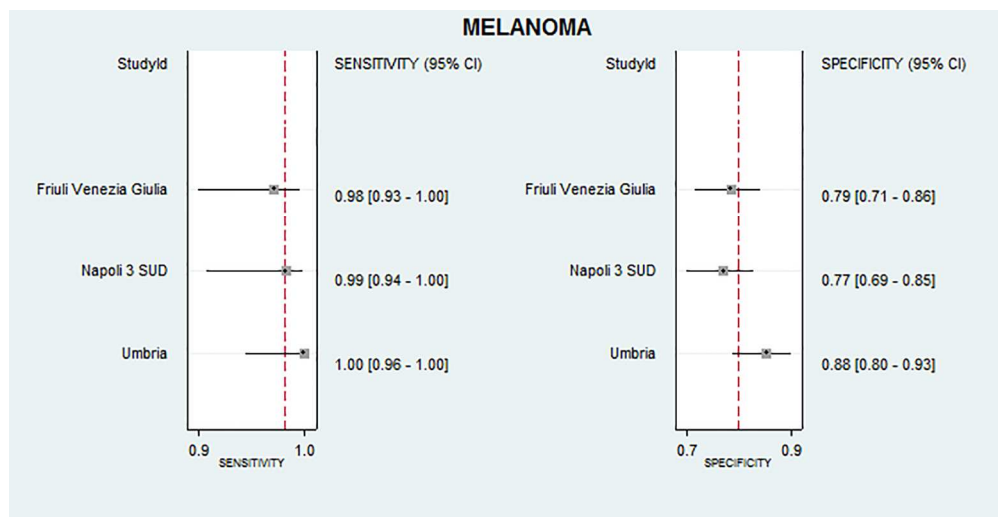

Sensitivity and specificity with 95% confidence intervals for malignant melanoma ICD-9-CM codes for the three administrative databases

173x88mm (300 x 300 DPI)

review only

| Section & Topic          | No  | Item                                                                                                                                                   | Reported on page # |
|--------------------------|-----|--------------------------------------------------------------------------------------------------------------------------------------------------------|--------------------|
| <b>TITLE OR ABSTRACT</b> |     |                                                                                                                                                        |                    |
|                          | 1   | Identification as a study of diagnostic accuracy using at least one measure of accuracy (such as sensitivity, specificity, predictive values, or AUC)  | 1                  |
| <b>ABSTRACT</b>          |     |                                                                                                                                                        |                    |
|                          | 2   | Structured summary of study design, methods, results, and conclusions (for specific guidance, see STARD for Abstracts)                                 | 2                  |
| <b>INTRODUCTION</b>      |     |                                                                                                                                                        |                    |
|                          | 3   | Scientific and clinical background, including the intended use and clinical role of the index test                                                     | 4                  |
|                          | 4   | Study objectives and hypotheses                                                                                                                        | 4                  |
| <b>METHODS</b>           |     |                                                                                                                                                        |                    |
| <i>Study design</i>      | 5   | Whether data collection was planned before the index test and reference standard were performed (prospective study) or after (retrospective study)     | 5                  |
| <i>Participants</i>      | 6   | Eligibility criteria                                                                                                                                   | 5-7                |
|                          | 7   | On what basis potentially eligible participants were identified (such as symptoms, results from previous tests, inclusion in registry)                 | 5-6                |
|                          | 8   | Where and when potentially eligible participants were identified (setting, location and dates)                                                         | 5-6                |
|                          | 9   | Whether participants formed a consecutive, random or convenience series                                                                                | 6                  |
| <i>Test methods</i>      | 10a | Index test, in sufficient detail to allow replication                                                                                                  | 6                  |
|                          | 10b | Reference standard, in sufficient detail to allow replication                                                                                          | 6-7                |
|                          | 11  | Rationale for choosing the reference standard (if alternatives exist)                                                                                  | 6                  |
|                          | 12a | Definition of and rationale for test positivity cut-offs or result categories of the index test, distinguishing pre-specified from exploratory         | 7                  |
|                          | 12b | Definition of and rationale for test positivity cut-offs or result categories of the reference standard, distinguishing pre-specified from exploratory | 7                  |
|                          | 13a | Whether clinical information and reference standard results were available to the performers/readers of the index test                                 | na                 |
|                          | 13b | Whether clinical information and index test results were available to the assessors of the reference standard                                          | na                 |
| <i>Analysis</i>          | 14  | Methods for estimating or comparing measures of diagnostic accuracy                                                                                    | 7                  |
|                          | 15  | How indeterminate index test or reference standard results were handled                                                                                | na                 |
|                          | 16  | How missing data on the index test and reference standard were handled                                                                                 | 7                  |
|                          | 17  | Any analyses of variability in diagnostic accuracy, distinguishing pre-specified from exploratory                                                      | na                 |
|                          | 18  | Intended sample size and how it was determined                                                                                                         | 7                  |
| <b>RESULTS</b>           |     |                                                                                                                                                        |                    |
| <i>Participants</i>      | 19  | Flow of participants, using a diagram                                                                                                                  | Figure 1           |
|                          | 20  | Baseline demographic and clinical characteristics of participants                                                                                      | Page 8 and Table 1 |
|                          | 21a | Distribution of severity of disease in those with the target condition                                                                                 | na                 |
|                          | 21b | Distribution of alternative diagnoses in those without the target condition                                                                            | na                 |
|                          | 22  | Time interval and any clinical interventions between index test and reference standard                                                                 | na                 |
| <i>Test results</i>      | 23  | Cross tabulation of the index test results (or their distribution) by the results of the reference standard                                            | Table 3            |
|                          | 24  | Estimates of diagnostic accuracy and their precision (such as 95% confidence intervals)                                                                | Page 8-9, Figure 2 |
|                          | 25  | Any adverse events from performing the index test or the reference standard                                                                            | na                 |
| <b>DISCUSSION</b>        |     |                                                                                                                                                        |                    |
|                          | 26  | Study limitations, including sources of potential bias, statistical uncertainty, and generalisability                                                  | 10-11              |
|                          | 27  | Implications for practice, including the intended use and clinical role of the index test                                                              | 11                 |
| <b>OTHER INFORMATION</b> |     |                                                                                                                                                        |                    |
|                          | 28  | Registration number and name of registry                                                                                                               | na                 |
|                          | 29  | Where the full study protocol can be accessed                                                                                                          | 4                  |
|                          | 30  | Sources of funding and other support; role of funders                                                                                                  | 12                 |
